# Supplementary material for: Cellular aging dynamics after acute malaria infection: A 12‐month longitudinal study
Source: PubMed Central journal article supplement (PMC5771395; doi:10.1111/acel.12702), 2017-11-16
Supplement: ACEL-17-na-s001.pdf [file ACEL-17-na-s001.pdf]

1 **Supplementary Materials**

2  
3 **Cellular aging dynamics after acute malaria infection: A 12-months**  
4 **longitudinal study**

5 Muhammad Asghar<sup>1\*</sup>, Victor Yman<sup>1</sup>, Manijeh Vafa-Homann<sup>1</sup>, Klara Sondén<sup>1,2</sup>, Ulf Hammar<sup>3</sup>,  
6 Dennis Hasselquist<sup>4</sup>, Anna Färnert<sup>1,2</sup>

7  
8  
9  
10  
11  
12  
13  
14  
15  
16  
17  
18  
19  
20  
21  
22  
23  
24  
25

26

### Supplementary Figures

27

28

29

30

31

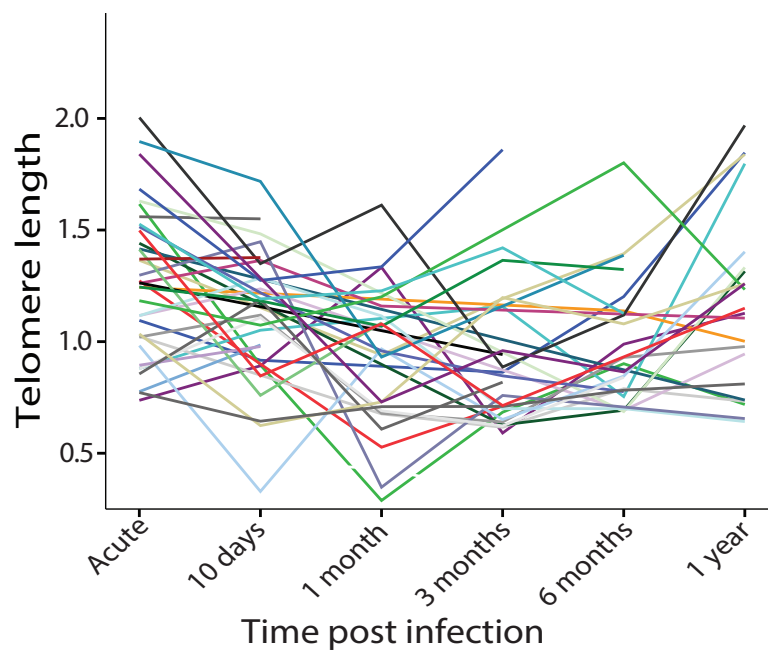

37

38 **Fig. S1**

39 Telomere length (T/S ratio) dynamics in blood of travelers followed one year after a  
40 successfully treated *P. falciparum* malaria infection. Each line represents an individual patient's  
41 telomere dynamics.

42

43

44

45

46

47  
48  
49  
50  
51  
52  
53  
54  
55  
56  
57  
58  
59  
60  
61  
62  
63  
64  
65  
66  
67  
68  
69  
70  
71

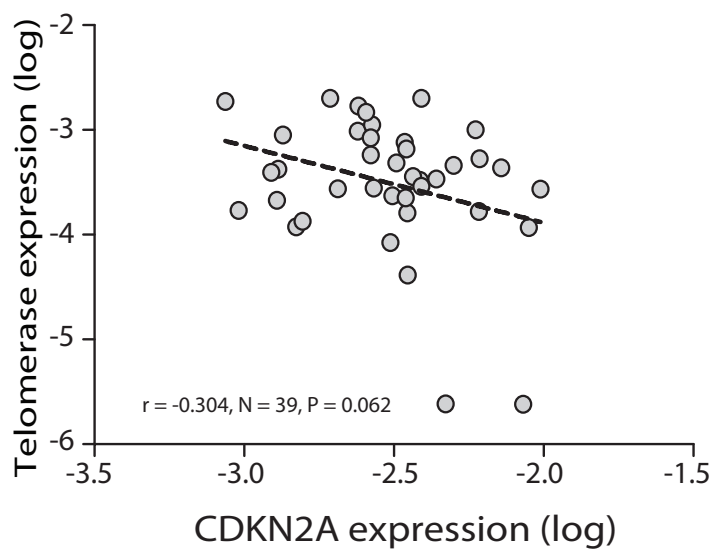

**Fig. S2**

Relationship between CDKN2A and telomerase expression (Pearson correlation, adjusted for cluster robust Standard Errors) in blood of subset of travelers (n=8) with RNA samples followed over one year after a successfully treated *P. falciparum* malaria infection.

72  
73  
74  
75  
76  
77  
78  
79  
80  
81  
82  
83  
84

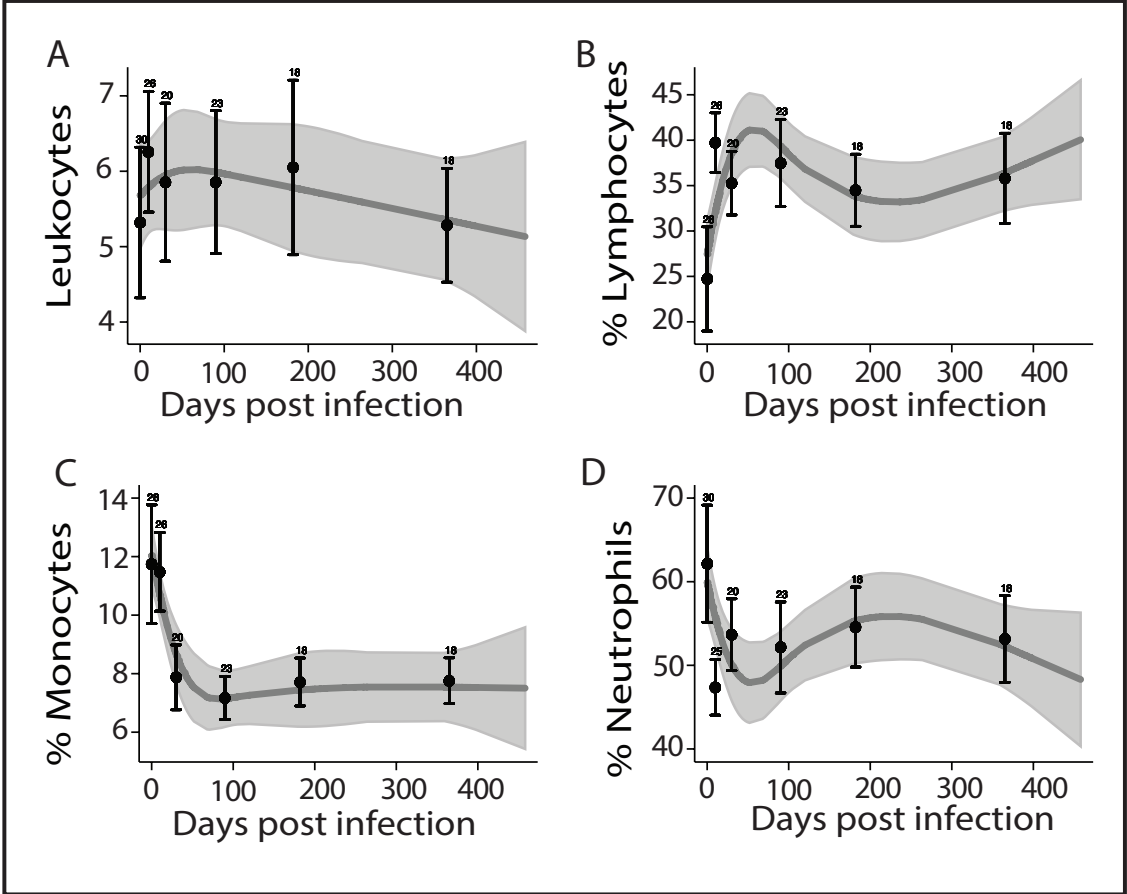

85 **Fig. S3**

86 Total leukocyte count (assuming  $5 \times 10^6$  erythrocytes per microliter whole blood) and proportion  
87 of different cell types in blood (%) over a one year follow up study in human travelers with  
88 successfully treated single malaria infection: (A) Leukocytes, (B) Lymphocytes, (C) Monocytes  
89 and (D) Neutrophils. Solid black lines denote the mixed model predicted mean proportion of  
90 cells (at the actual measurement time points) and the shaded gray areas denote the 95% CI of  
91 the model prediction. Black points denote the observed mean proportion of cells at each time  
92 point (pooled data at expected measurement day) and error bars denote the 95% CI of the mean.  
93 Numbers on each error bar represents the sample size. Lymphocytes, monocytes and  
94 neutrophils are presented as the % proportion of total leukocytes.

## Supplementary Tables

**Table S1:** Paired t-tests predicting telomere length dynamics in blood in travelers over a year follow up. Mean difference of telomere length levels are presented as (Mean diff) and 95% confidence interval of mean difference as (95% CI).

|                  | <i>Day 10</i>                                                           | <i>1 month</i>                                                             | <i>3 months</i>                                                            | <i>6 months</i>                                                         | <i>12 months</i>                                                        |
|------------------|-------------------------------------------------------------------------|----------------------------------------------------------------------------|----------------------------------------------------------------------------|-------------------------------------------------------------------------|-------------------------------------------------------------------------|
| <b>Acute (0)</b> | Mean diff = -0.14<br>95% CI = -0.02 - -0.25<br>N = 30, <b>p = 0.022</b> | Mean diff = -0.36<br>95% CI = -0.19 - -0.25<br>N = 25, <b>p &lt; 0.001</b> | Mean diff = -0.34<br>95% CI = -0.19 - -0.48<br>N = 26, <b>p &lt; 0.001</b> | Mean diff = -0.26<br>95% CI = -0.09 - -0.43<br>N = 24, <b>p = 0.004</b> | Mean diff = -0.07<br>95% CI = 0.12 - -0.26<br>N = 23, p = 0.460         |
| <b>Day 10</b>    |                                                                         | Mean diff = -0.11<br>95% CI = 0.07 - -0.31<br>N = 21, p = 0.233            | Mean diff = -0.10<br>95% CI = 0.07 - -0.27<br>N = 20, p = 0.243            | Mean diff = -0.07<br>95% CI = 0.11 - -0.26<br>N = 19, p = 0.411         | Mean diff = 0.14<br>95% CI = 0.41 - -0.12<br>N = 17, p = 0.277          |
| <b>1 months</b>  |                                                                         |                                                                            | Mean diff = 0.10<br>95% CI = 0.17 - -0.15<br>N = 21, p = 0.902             | Mean diff = 0.09<br>95% CI = 0.26 - -0.07<br>N = 18, p = 0.236          | Mean diff = 0.21<br>95% CI = 0.38 - 0.03<br>N = 16, <b>p = 0.022</b>    |
| <b>3months</b>   |                                                                         |                                                                            |                                                                            | Mean diff = 0.07<br>95% CI = 0.17 - -0.25<br>N = 19, p = 0.134          | Mean diff = 0.39<br>95% CI = 0.58 - 0.21<br>N = 17, <b>p &lt; 0.001</b> |
| <b>6 months</b>  |                                                                         |                                                                            |                                                                            |                                                                         | Mean diff = 0.26<br>95% CI = 0.45 - 0.06<br>N = 18, <b>p = 0.011</b>    |

---

*Two tailed p-value significance level 0.05*

**Table S2:** Paired t-tests predicting telomerase expression dynamics in blood in travelers over a year follow up. Mean difference of telomerase expression levels are presented as (Mean diff) and 95% confidence interval of mean difference as (95% CI).

|                  | <i>Day 10</i>                                                                                               | <i>1 month</i>                                                                                                     | <i>3 months</i>                                                                                                 | <i>6 months</i>                                                                                       | <i>12 months</i>                                                                                      |
|------------------|-------------------------------------------------------------------------------------------------------------|--------------------------------------------------------------------------------------------------------------------|-----------------------------------------------------------------------------------------------------------------|-------------------------------------------------------------------------------------------------------|-------------------------------------------------------------------------------------------------------|
| <b>Acute (0)</b> | Mean diff = -2.64<br>95% CI = 0.03 - -5.31<br>N = 7, p = 0.052 <sup>a</sup><br><b>p = 0.042<sup>b</sup></b> | Mean diff = -1.06<br>95% CI = -0.31 - -1.81<br>N = 7, <b>p = 0.013<sup>a</sup></b><br><b>p = 0.028<sup>b</sup></b> | Mean diff = -0.59<br>95% CI = 0.03 - -1.21<br>N = 7, p = 0.059 <sup>a</sup><br><b>p = 0.028<sup>b</sup></b>     | Mean diff = -0.09<br>95% CI = 1.81 - -1.98<br>N = 7, p = 0.902 <sup>a</sup><br>p = 0.892 <sup>b</sup> | Mean diff = -1.26<br>95% CI = 0.67 - -3.21<br>N = 5, p = 0.145 <sup>a</sup><br>p = 0.138 <sup>b</sup> |
| <b>Day 10</b>    |                                                                                                             | Mean diff = 1.62<br>95% CI = 4.25 - -1.00<br>N = 6, p = 0.173 <sup>a</sup><br>p = 0.173 <sup>b</sup>               | Mean diff = 2.72<br>95% CI = 5.01 - 0.44<br>N = 6, <b>p = 0.028<sup>a</sup></b><br><b>p = 0.027<sup>b</sup></b> | Mean diff = 1.91<br>95% CI = 5.32 - -1.49<br>N = 4, p = 0.171 <sup>a</sup><br>p = 0.067 <sup>b</sup>  | Mean diff = 1.185<br>95% CI = 7.02 - -3.31<br>N = 4, p = 0.336 <sup>a</sup><br>p = 0.273 <sup>b</sup> |
| <b>1 months</b>  |                                                                                                             |                                                                                                                    | Mean diff = 0.53<br>95% CI = 1.51 - -0.44<br>N = 6, p = 0.219 <sup>a</sup><br>p = 0.345 <sup>b</sup>            | Mean diff = 0.175<br>95% CI = 1.85 - -0.35<br>N = 5, p = 0.131 <sup>a</sup><br>p = 0.079 <sup>b</sup> | Mean diff = -0.36<br>95% CI = 1.47 - -2.21<br>N = 5, p = 0.609 <sup>a</sup><br>p = 0.685 <sup>b</sup> |
| <b>3months</b>   |                                                                                                             |                                                                                                                    |                                                                                                                 | Mean diff = -0.37<br>95% CI = 1.99 - -2.07<br>N = 4, p = 0.957 <sup>a</sup><br>p = 0.715 <sup>b</sup> | Mean diff = -0.94<br>95% CI = 1.36 - -3.25<br>N = 4, p = 0.283 <sup>a</sup><br>p = 0.273 <sup>b</sup> |
| <b>6 months</b>  |                                                                                                             |                                                                                                                    |                                                                                                                 |                                                                                                       | Mean diff = -1.55<br>95% CI = 0.43 - -3.15<br>N = 4, p = 0.054 <sup>a</sup><br>p = 0.068 <sup>b</sup> |

*Paired t-test<sup>a</sup>, Wilcoxon signed-rank test<sup>b</sup>*  
*Two tailed p-value significance level 0.05*

**Table S3:** Paired t-tests predicting CDKN2A expression dynamics in blood in travelers over a year follow up. Mean difference of CDKN2A levels are presented as (Mean diff) and 95% confidence interval of mean difference as (95% CI).

|                  | <i>Day 10</i>                                                                                             | <i>1 month</i>                                                                                        | <i>3 months</i>                                                                                                    | <i>6 months</i>                                                                                                    | <i>12 months</i>                                                                                             |
|------------------|-----------------------------------------------------------------------------------------------------------|-------------------------------------------------------------------------------------------------------|--------------------------------------------------------------------------------------------------------------------|--------------------------------------------------------------------------------------------------------------------|--------------------------------------------------------------------------------------------------------------|
| <b>Acute (0)</b> | Mean diff = 0.33<br>95% CI = 0.65 - 0.01<br>N = 7, <b>p = 0.045<sup>a</sup></b><br>p = 0.063 <sup>b</sup> | Mean diff = -0.13<br>95% CI = 0.36 - -0.62<br>N = 7, p = 0.539 <sup>a</sup><br>p = 0.499 <sup>b</sup> | Mean diff = -0.89<br>95% CI = -0.16 - -1.61<br>N = 7, <b>p = 0.023<sup>a</sup></b><br><b>p = 0.028<sup>b</sup></b> | Mean diff = -0.77<br>95% CI = -0.32 - -1.22<br>N = 5, <b>p = 0.009<sup>a</sup></b><br><b>p = 0.043<sup>b</sup></b> | Mean diff = -0.55<br>95% CI = -0.06 - -1.04<br>N = 5, <b>p = 0.035<sup>a</sup></b><br>p = 0.079 <sup>b</sup> |
| <b>Day 10</b>    |                                                                                                           | Mean diff = -0.32<br>95% CI = 0.41 - -1.04<br>N = 6, p = 0.312 <sup>a</sup><br>p = 0.248 <sup>b</sup> | Mean diff = -1.12<br>95% CI = -0.14 - -2.35<br>N = 6, <b>p = 0.034<sup>a</sup></b><br><b>p = 0.046<sup>b</sup></b> | Mean diff = -1.12<br>95% CI = -0.11 - -2.13<br>N = 4, <b>p = 0.038<sup>a</sup></b><br>p = 0.068 <sup>b</sup>       | Mean diff = -1.10<br>95% CI = -0.18 - -2.02<br>N = 4, <b>p = 0.031<sup>a</sup></b><br>p = 0.067 <sup>b</sup> |
| <b>1 months</b>  |                                                                                                           |                                                                                                       | Mean diff = -0.67<br>95% CI = 0.25 - -1.60<br>N = 6, p = 0.11 <sup>a</sup><br>p = 0.074 <sup>b</sup>               | Mean diff = -0.50<br>95% CI = 0.45 - -1.44<br>N = 5, p = 0.224 <sup>a</sup><br>p = 0.224 <sup>b</sup>              | Mean diff = -0.17<br>95% CI = 0.67 - -1.02<br>N = 5, p = 0.601 <sup>a</sup><br>p = 0.500 <sup>b</sup>        |
| <b>3months</b>   |                                                                                                           |                                                                                                       |                                                                                                                    | Mean diff = -0.35<br>95% CI = 1.16 - -1.87<br>N = 4, p = 0.508 <sup>a</sup><br>p = 0.465 <sup>b</sup>              | Mean diff = 0.45<br>95% CI = 2.04 - -1.13<br>N = 4, p = 0.430 <sup>a</sup><br>p = 0.465 <sup>b</sup>         |
| <b>6 months</b>  |                                                                                                           |                                                                                                       |                                                                                                                    |                                                                                                                    | Mean diff = 0.24<br>95% CI = 0.31 - 0.16<br>N = 4, <b>p = 0.002<sup>a</sup></b><br>p = 0.067 <sup>b</sup>    |

*Paired t-test<sup>a</sup>, Wilcoxon signed-rank test<sup>b</sup>*  
*Two tailed p-value significance level 0.05*

**Table S4:** Relationship between telomerase expression and CDKN2A in multivariate mixed effects models, with time modeled as a restricted cubic spline (N = 39, patients = 8).

| <i>Factors</i> | <i>Coef.</i> | <i>SE.</i> | <i>p-value</i> |
|----------------|--------------|------------|----------------|
| Telomerase     | -0.10        | 0.06       | 0.123          |
| Age            | 0.02         | 0.09       | 0.378          |
| Sex            | -0.07        | 0.65       | 0.912          |
| Foreign born   | -0.21        | 1.09       | 0.846          |

*All analyses adjust for time (days since start of treatment), using cubic splines with 4 knots.  
Two tailed p-value significance level 0.05*



**Table S5:** Relationship between differential proportion of leukocytes with telomere length in multivariate mixed effects models, with time modeled as a restricted cubic spline (N = 135, patients = 34).

| <i>Factors</i> | <i>Coef.</i> | <i>SE.</i> | <i>p-value</i> |
|----------------|--------------|------------|----------------|
| Leukocytes     | -0.02        | 0.01       | 0.160          |
| Lymphocytes    | 0.001        | 0.001      | 0.747          |
| Monocytes      | 0.01         | 0.01       | 0.166          |
| Neutrophils    | -0.001       | 0.001      | 0.303          |

*All analyses adjust for time (days since start of treatment), using cubic splines with 4 knots.  
Two tailed p-value significance level 0.05*
